# Supplementary material for: A radical approach for fluorescent turn ‘on’ detection, differentiation and bioimaging of methanol
Source: Royal Society of Chemistry journal article supplement (doi:10.1039/c5ob01333j), 2015-01-01
Supplement: c5ob01333j1.pdf [file c5ob01333j1.pdf]

*Electronic Supplementary Informations*

**A radical approach for fluorescent turn ‘on’ detection, differentiation and bioimaging of methanol**

**Virendra Kumar,<sup>a</sup> Ajit Kumar,<sup>a</sup> Uzra Diwan,<sup>a</sup> Manish Kumar Singh,<sup>b</sup> and K. K. Upadhyay<sup>a\*</sup>**

*Department of Chemistry (Centre of Advanced Study), Faculty of Science, Banaras Hindu University, Varanasi, Uttar Pradesh-221005, India.*

*Department of Zoology (Centre of Advanced Study), Faculty of Science, Banaras Hindu University, Varanasi, Uttar Pradesh-221005, India.*

*E-mail: drkaushalbhu@yahoo.co.in; kku@bhu.ac.in, Tel No.: +91-542-6702488*

---

**TABLE OF CONTENTS**

| <b>S. No.</b> | <b>Figures</b>            | <b>Captions</b>                                                                       | <b>Page No.</b> |
|---------------|---------------------------|---------------------------------------------------------------------------------------|-----------------|
| <b>1.</b>     |                           | Experimental section                                                                  | <b>3-5</b>      |
| <b>2.</b>     | <b>Figure S1</b>          | <sup>1</sup> H NMR spectrum of <b>RC</b> in CDCl <sub>3</sub>                         | <b>6</b>        |
| <b>3.</b>     | <b>Figure S2</b>          | <sup>13</sup> C NMR spectrum of <b>RC</b> in CDCl <sub>3</sub>                        | <b>7</b>        |
| <b>4.</b>     | <b>Figure S3</b>          | IR spectrum of <b>RC</b>                                                              | <b>8</b>        |
| <b>5.</b>     | <b>Figure S4</b>          | Mass spectrum of <b>RC</b>                                                            | <b>9</b>        |
| <b>6.</b>     | <b>Figure S5</b>          | UV-visible absorbance spectrum of <b>RC</b> in different solvent                      | <b>10</b>       |
| <b>7.</b>     | <b>Figure S6a &amp; b</b> | Visible/fluorescence color changes of <b>RC</b> in different solvents                 | <b>11</b>       |
| <b>8.</b>     | <b>Figure S7</b>          | <sup>1</sup> H NMR spectrum of <b>RO</b> in CDCl <sub>3</sub>                         | <b>12</b>       |
| <b>9.</b>     | <b>Figure S8</b>          | Proposed mechanism of nucleophile attack of methanol over <b>RC</b>                   | <b>13</b>       |
| <b>10.</b>    | <b>Figure S9</b>          | IR spectrum of <b>RO</b>                                                              | <b>14</b>       |
| <b>11.</b>    | <b>Figure S10</b>         | Overlay IR spectrum of <b>RC</b> and <b>RO</b>                                        | <b>15</b>       |
| <b>12.</b>    | <b>Figure S11</b>         | Mass spectrum of <b>RO</b>                                                            | <b>16</b>       |
| <b>13.</b>    | <b>Figure S12</b>         | HOMO-LUMO orbitals of <b>RC</b> and <b>RO</b> their calculated energy and energy gaps | <b>17</b>       |

## *Electronic Supplementary Informations*

|            |                   |                                                                                                    |           |
|------------|-------------------|----------------------------------------------------------------------------------------------------|-----------|
|            |                   | are shown                                                                                          |           |
| <b>14.</b> | <b>Figure S13</b> | Fluorescence reaction time profile of receptor <b>RC</b> at 0.5 $\mu$ M in MeOH                    | <b>18</b> |
| <b>15.</b> | <b>Figure S14</b> | Calibration curve of <b>RC</b> in water with increasing MeOH%                                      | <b>19</b> |
| <b>16.</b> | <b>Table S1</b>   | Important bond length and bond angle of <b>RO</b>                                                  | <b>20</b> |
| <b>17.</b> | <b>Table S2</b>   | Crystal data and structure refinement for <b>RO</b>                                                | <b>21</b> |
| <b>18.</b> | <b>Table S3</b>   | The selected experimental and calculated dihedral angles in <b>RC</b> and <b>RO</b>                | <b>22</b> |
| <b>19.</b> | <b>Table S4</b>   | Theoretical calculation of absorption maxima of <b>RC</b> and <b>RO</b> in MeOH using TD-DFT study | <b>23</b> |

## **Experimental section**

## Electronic Supplementary Informations

**1.1. Synthesis of RC:** RC was synthesized by adding 2.0 mM acetonitrile solution of 7-(diethylamino)-2-oxo-2H-chromene-3-carbaldehyde to the equimolar acetonitrile solution of 3-aminorhodanine followed by constant stirring for three hours at room temperature (**Scheme 1**). A brick red solid was precipitated which was filtered and washed with diethyl ether and finally dried under vacuum over anhydrous CaCl<sub>2</sub>. RC was characterized through various spectroscopic techniques like IR, <sup>1</sup>H & <sup>13</sup>C NMR spectral studies along with mass determination through ESI-MS (**ESI; Fig. S1-S4**).

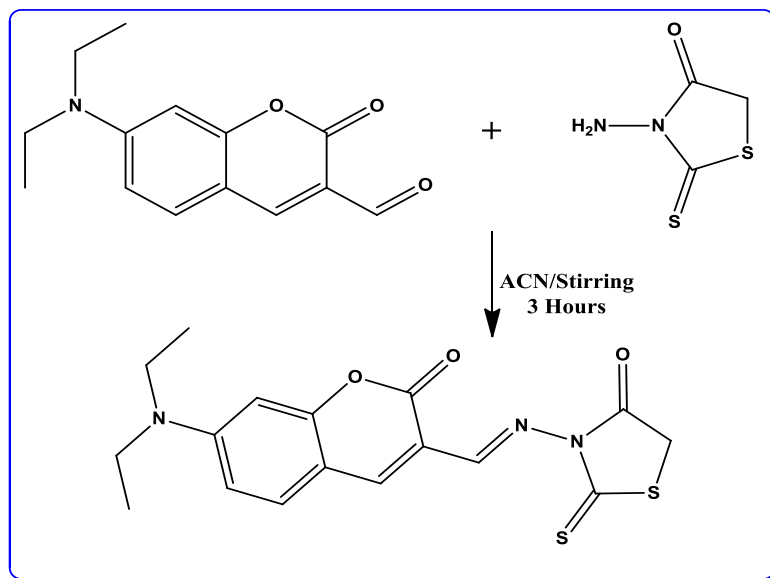

**Scheme 1:** Synthesis of RC

**Spectroscopic characterization data:** Yield: 86%, IR/cm<sup>-1</sup>: 2971, 2929, 1741, 1709, 1620, 1598, 1563, 1513, 1483, 1428, 1379, 1350, 1311, 1295, 1259, 1233, 1188, 1133, 1078, 1029, 955, 904, 875, 835, 796, 761, 688, 637; <sup>1</sup>H NMR (300 MHz, CDCl<sub>3</sub>, 298K, TMS): δ = 1.233-1.279 (t, 6H, CH<sub>3</sub>), 3.433-3.504 (q, 4H, CH<sub>2</sub>), 4.077 (s, 2H, CH<sub>2</sub>), 6.490 (s, 1H, Ar-H), 6.613-6.635, (d, 1H, Ar-H), 7.369-7.399 (d, 1H, Ar-H), 8.587, (s, 1H, Ar-H), 8.740 (s, 1H, -CH=N) δ ppm; <sup>13</sup>C NMR (75

## *Electronic Supplementary Informations*

**MHz, CDCl<sub>3</sub>, 298K, TMS):**  $\delta$ =194.83, 169.03, 161.07, 158.34, 152.90, 143.23, 131.79, 131.41, 110.23, 109.81, 108.46, 97.30, 96.92, 45.17, 33.73, 12.63, 12.27  $\delta$  ppm; **MS m/z (ESI) = 376.00** Calc. for, C<sub>17</sub>H<sub>17</sub>N<sub>3</sub>O<sub>3</sub>S<sub>2</sub>= **375.47**.

- 1.2. Apparatus:** IR Spectra were recorded with a Perkin-Elmer spectrometer using KBr pellets. The corresponding <sup>1</sup>H NMR and <sup>13</sup>C NMR spectra were recorded in CDCl<sub>3</sub> with a JEOL AL 300 FT NMR Spectrometer instrument using tetramethylsilane (Si(CH<sub>3</sub>)<sub>4</sub>) as an internal standard. <sup>1</sup>H and <sup>13</sup>C chemical shifts are reported in parts per million (ppm) relative to the residual proton signal of the deuterated solvents. Mass spectrometric analysis was carried out on a MDS Sciex API 2000 LCMS spectrometer while HRMS of **RO** was recorded at Water-Q-ToF Premier-HAB213. The electronic spectra and UV-visible titrations were carried out room temperature (298 K) on a UV-1700/1800 Pharmaspec spectrophotometer with quartz cuvette (path length=1 cm). The emission spectra were recorded at JY HORIBA Fluorescence spectrophotometer.
- 1.3. Materials:** All the reagents and solvents for synthesis were purchased from Sigma-Aldrich and were used without further purification. All reactions were carried out using commercial-grade solvents.
- 1.4. Theoretical Calculations:** The geometric and energy optimizations were performed with the Gaussian 03 program based on the density functional theory (DFT) method.<sup>S1</sup> Becke's three parameter hybrid functional with the Lee-Yang-Parr correlation functional (B3LYP) was employed for all the calculations. The 3-21G\*\* basis set was used to treat all atoms.
- 1.5. X-ray diffraction studies:** Single crystal X-ray diffraction measurements were carried out on an Oxford Diffraction Xcalibur system with a Ruby CCD detector using graphite-monochromated MoK $\alpha$  radiation ( $k = 0.71073 \text{ \AA}$ ). All the determinations of unit cell and intensity data were performed with graphite-mono-chromated Mo-K $\alpha$  radiation ( $\lambda = 0.71073 \text{ \AA}$ ). Data for the ligand and metal complexes were collected at room temperature/liquid nitrogen temperature. The structures were solved by direct methods, using Fourier techniques, and refined by full-matrix least-squares on  $F^2$  using the SHELXTL-97 program package.<sup>S2</sup>
- 1.6. Cell Imaging Studies:** *E. coli* strains (DH5- $\alpha$ ) were grown in LB media at 37° C overnight in shaker incubator. The cells were collected in sterile water and vortexed to make the suspension homogeneous. These cell cultures were incubated with **RC**

### *Electronic Supplementary Informations*

(10 $\mu$ M) from 1.0 mM stock in 50mM phosphate buffer (pH 7.54) for 1 hour. The treated cells were examined by the excitation range from 450-490 nm and emission range from 500-560 nm on a fluorescence microscope (Nikon-E800, Japan).

#### ***References:***

**S1.** M. J. Frisch, et al., GAUSSIAN 03, (Revision D.01), Gaussian, Inc., Wallingford, CT, 2004.

**S2. (a)** G. M. Sheldrick, SHELXL-97, Program for X-ray Crystal Structure Refinement, Göttingen University, Göttingen, Germany, 1997; **(b)** G. M. Sheldrick, SHELXS-97, Program for X-ray Crystal Structure Solution, Göttingen University, Göttingen, Germany, 1997.

*Electronic Supplementary Informations*

**Figure S1:**  $^1\text{H}$  NMR spectrum of **RC** in  $\text{CDCl}_3$ :

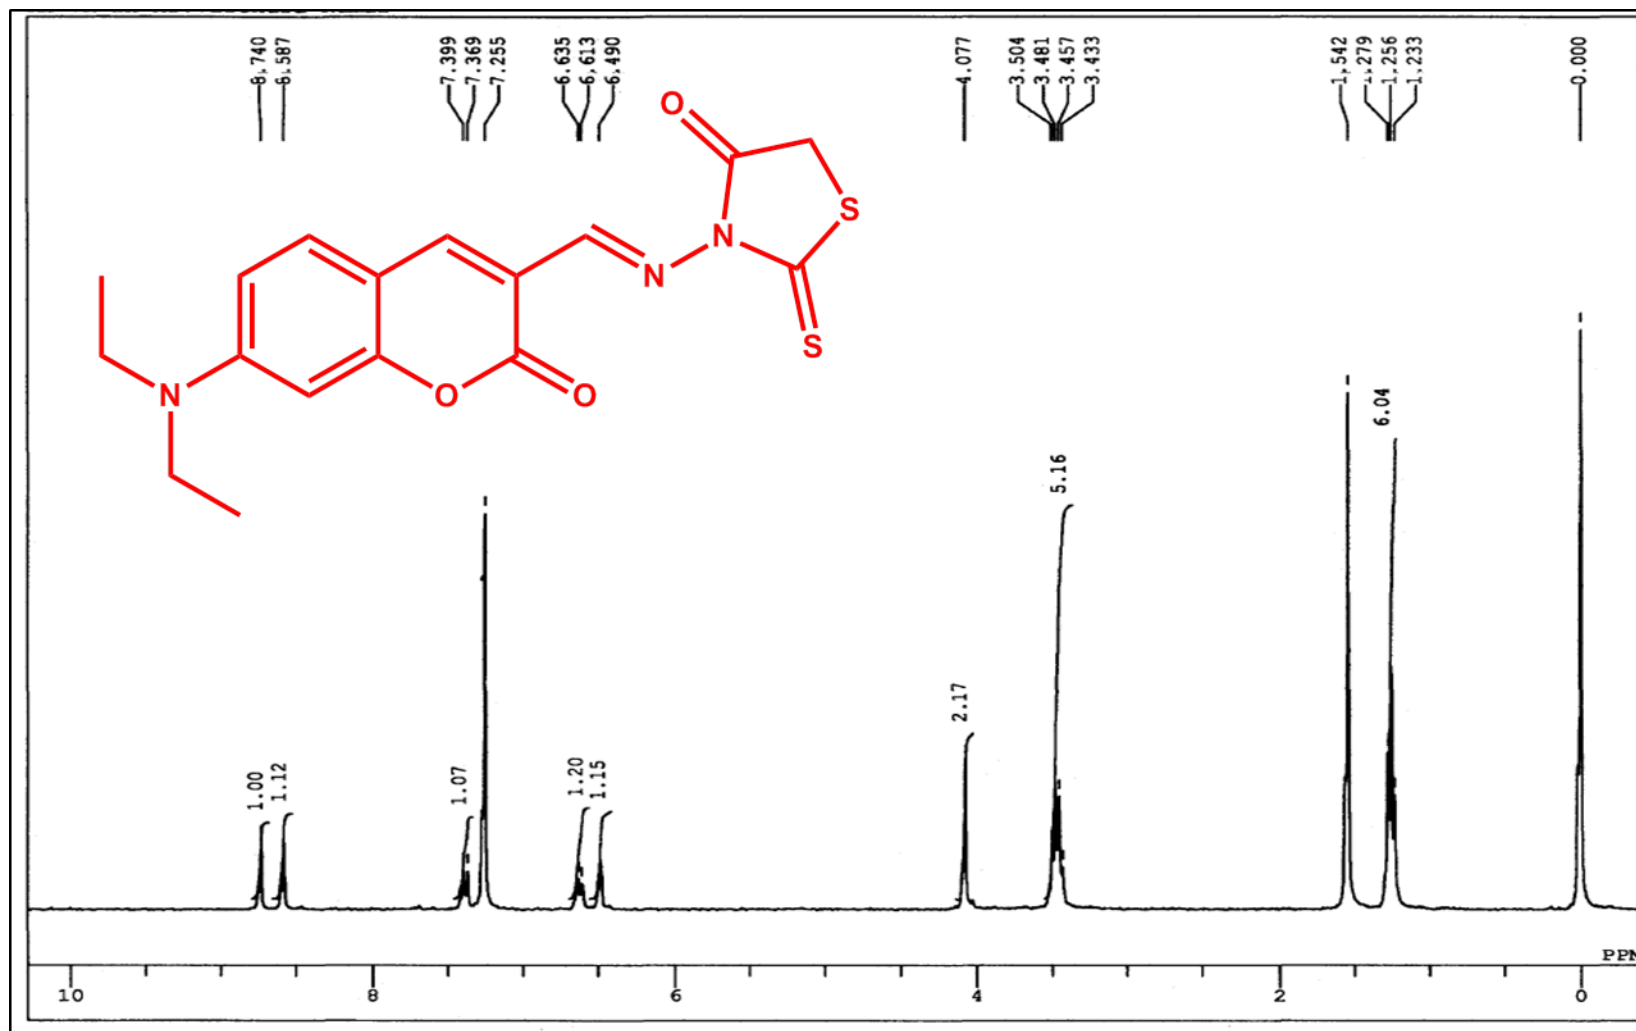

*Electronic Supplementary Informations*

**Figure S2:**  $^{13}\text{C}$  NMR spectrum of **RC**:

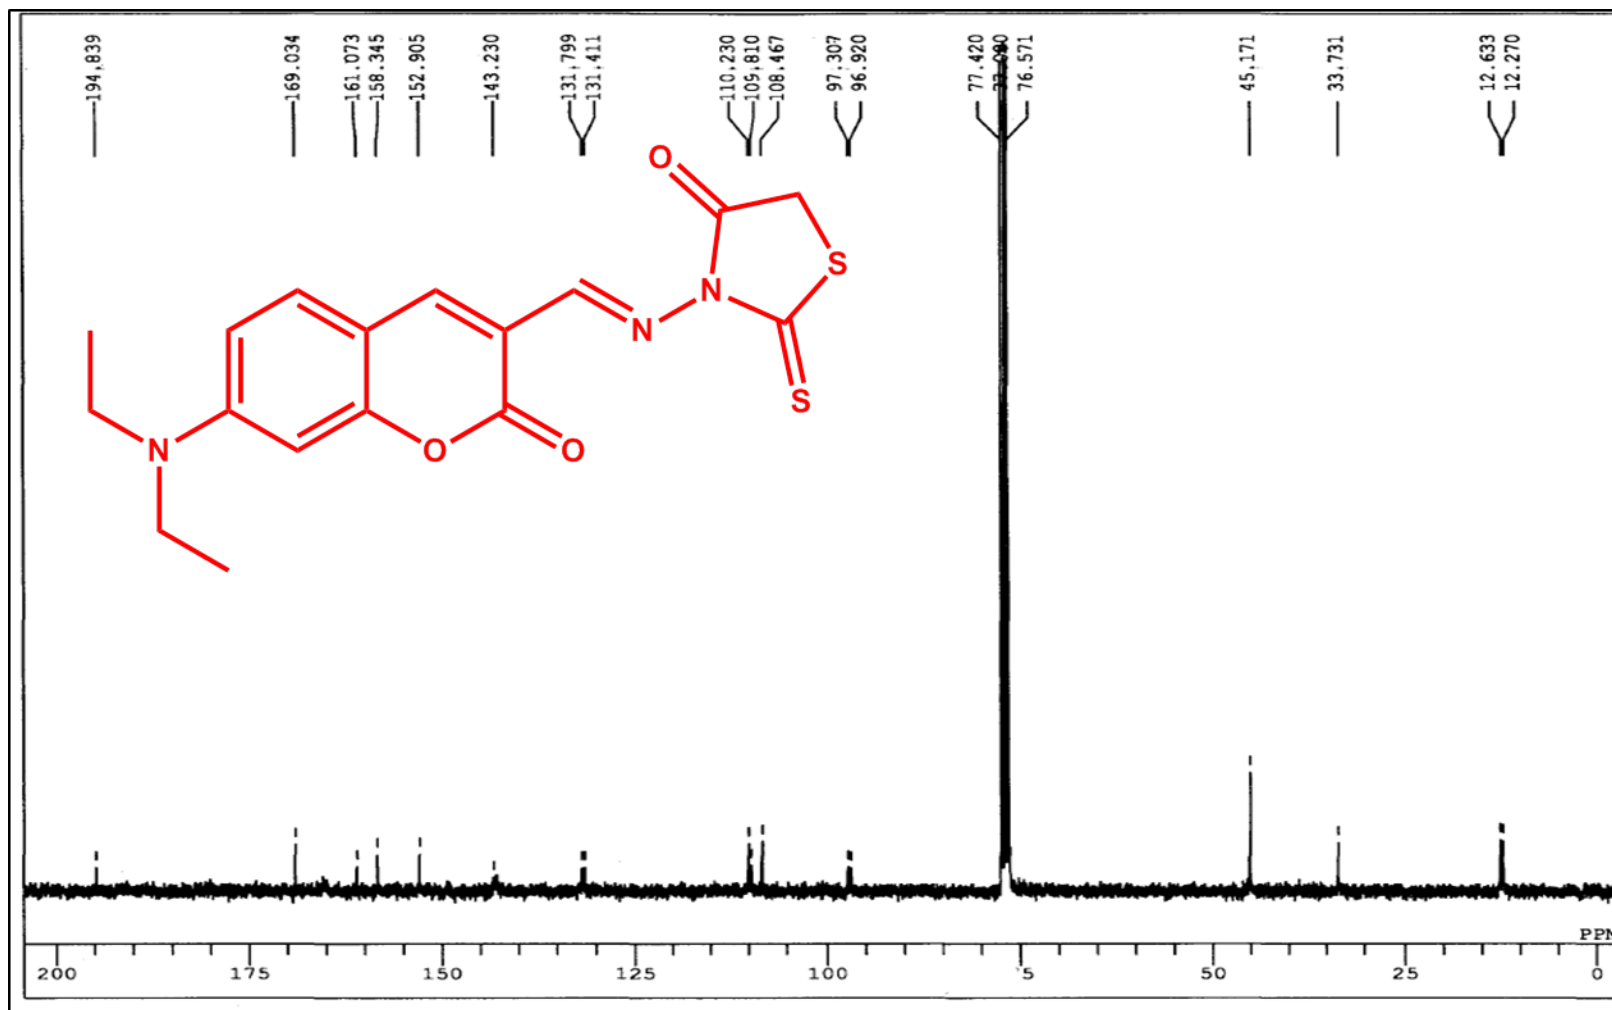

*Electronic Supplementary Informations*

**Figure S3:** IR spectrum of **RC**:

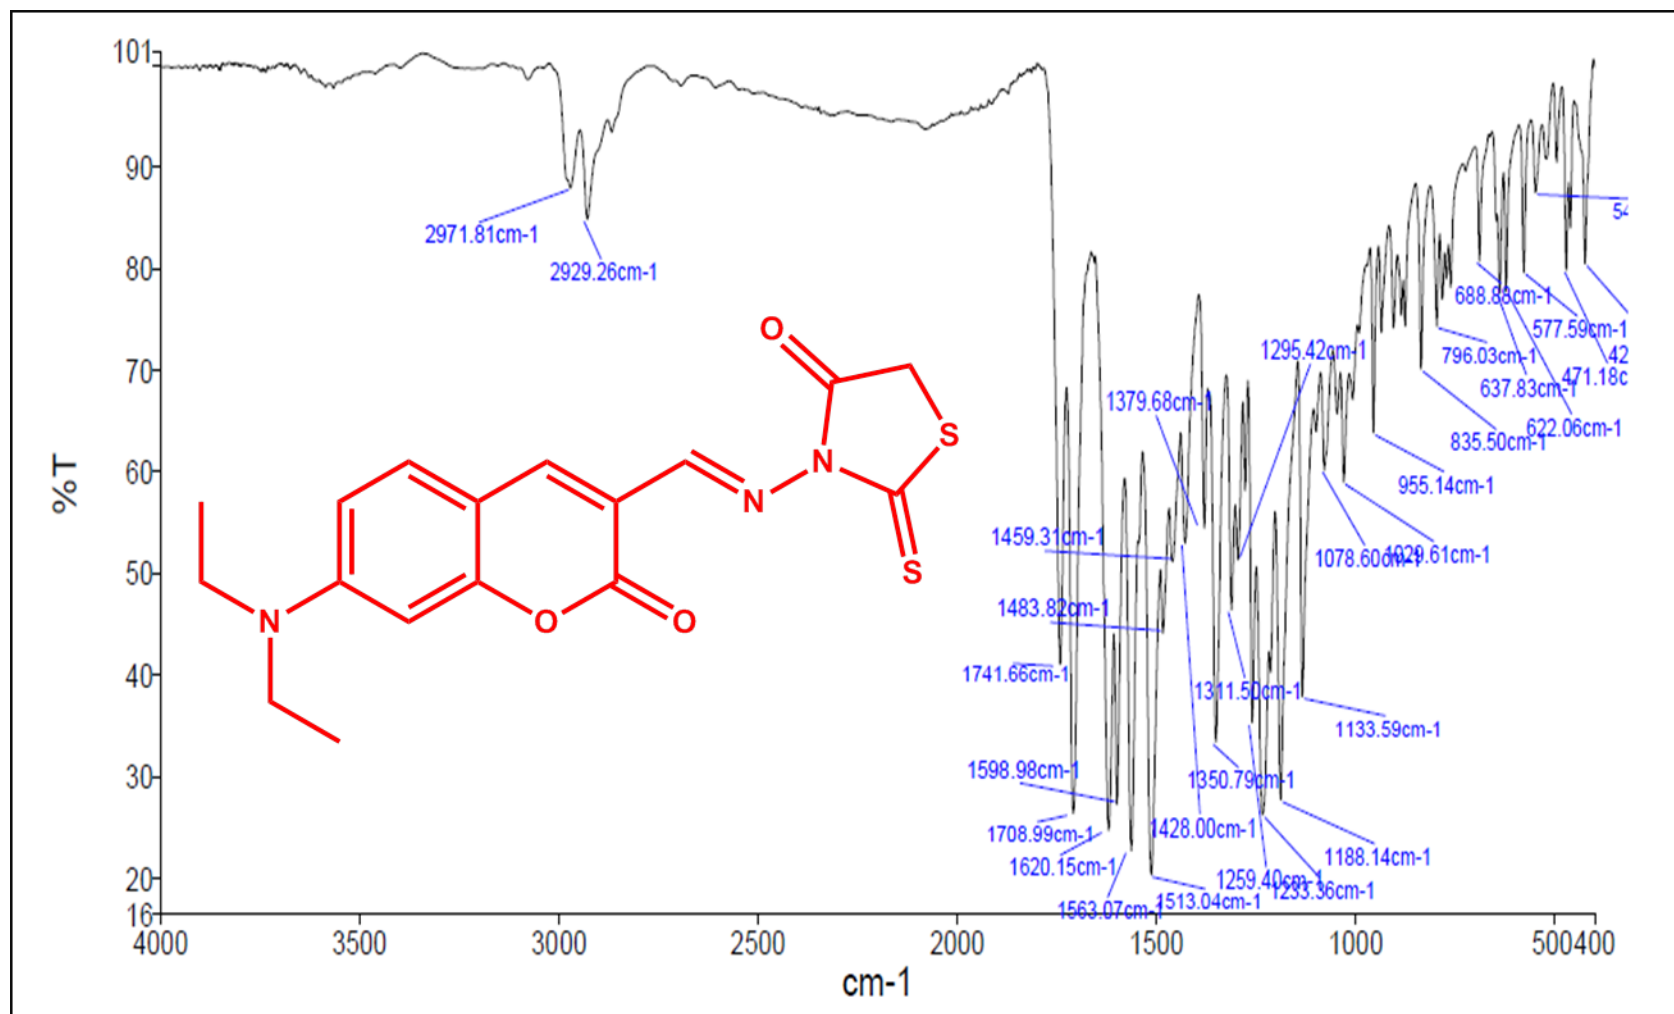



*Electronic Supplementary Informations*

**Figure S4:** Mass spectrum of **RC**:

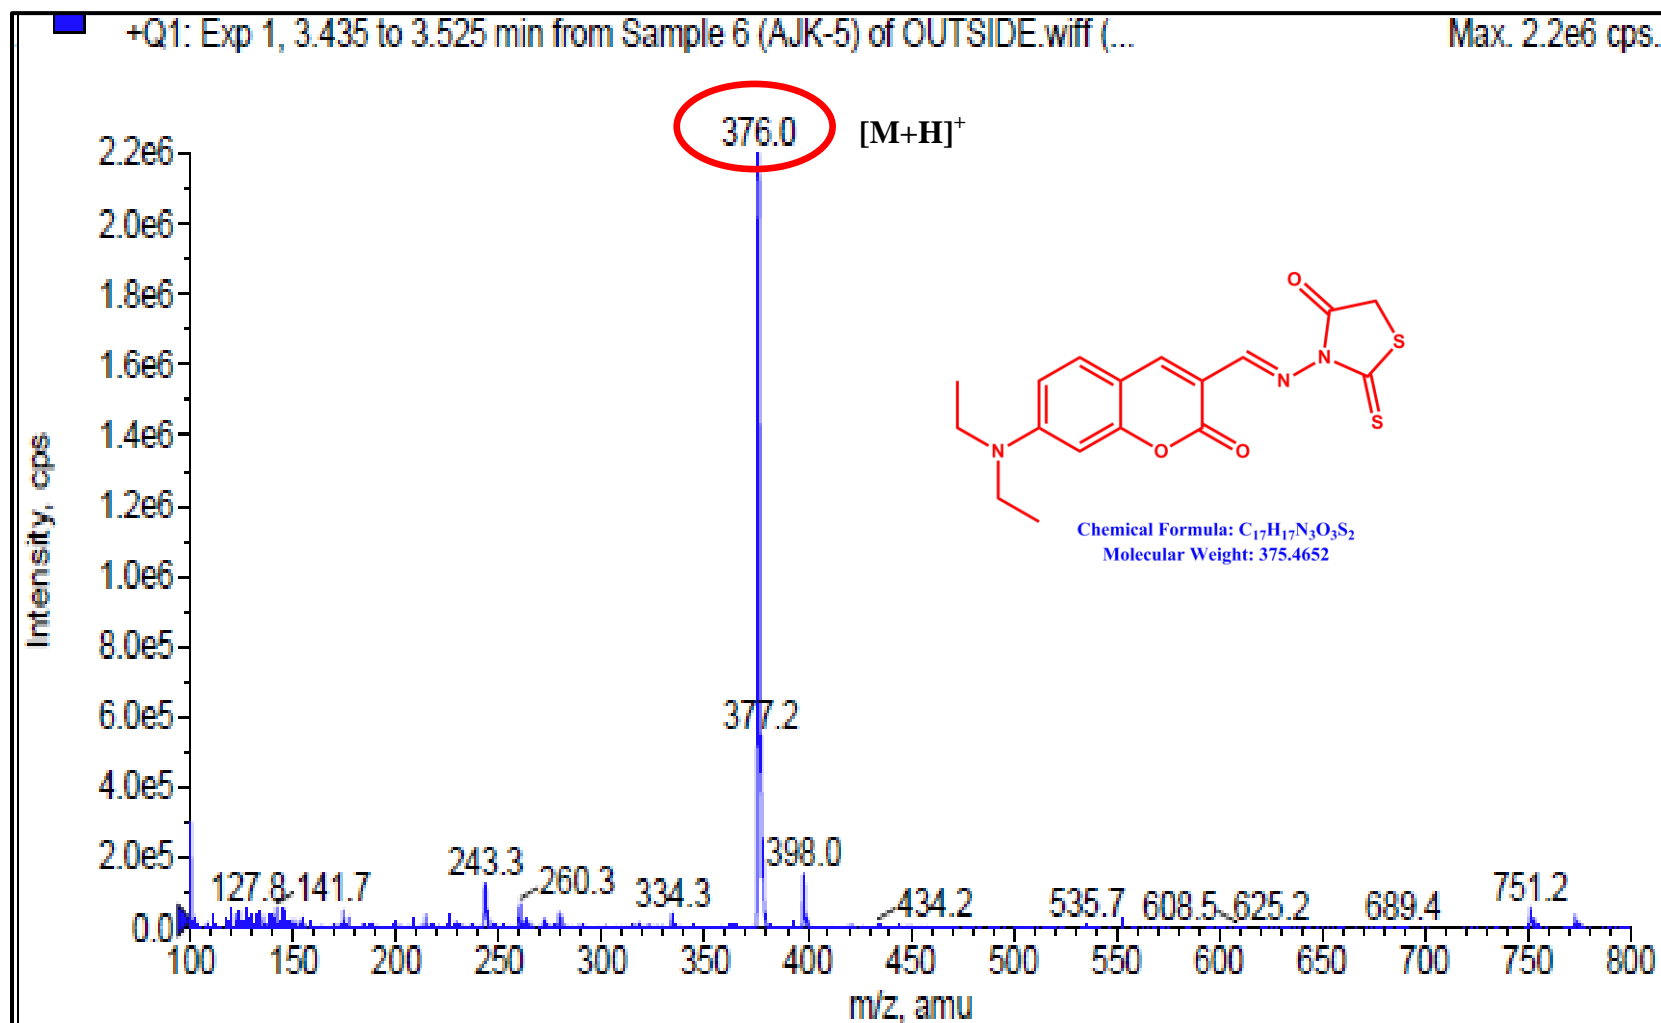

*Electronic Supplementary Informations*

**Figure S5:** UV-visible absorbance spectrum of **RC** in different solvent:

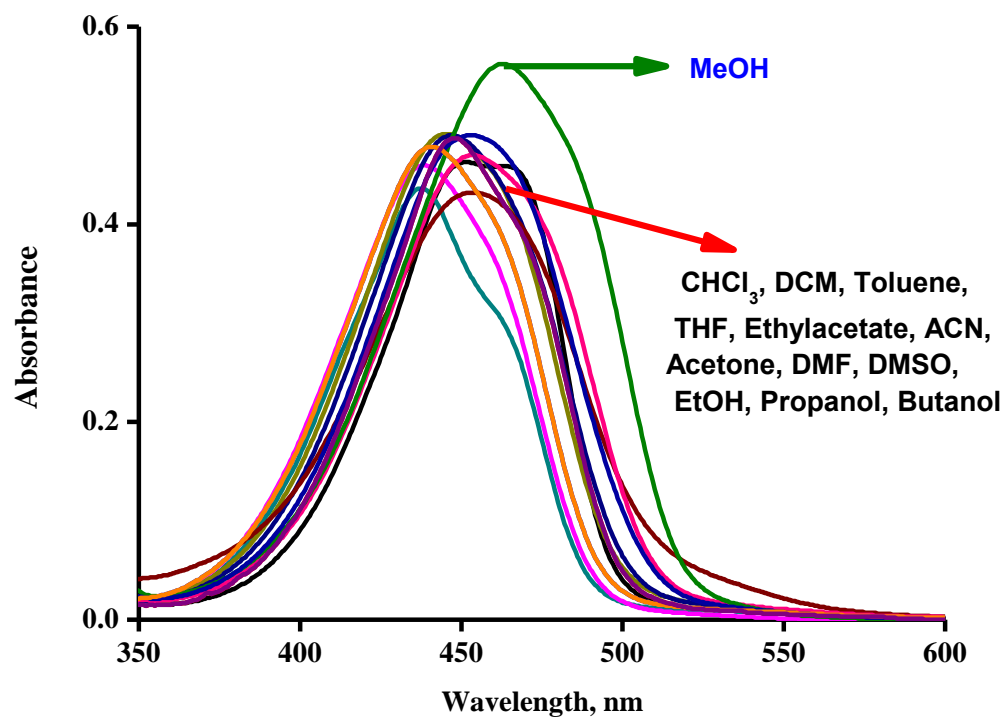

*Electronic Supplementary Informations*

**Figure S6a:** Selective visible color changes of **RC** in various solvents; from left to right:  $\text{CHCl}_3$ , DCM, Toluene, THF, Ethylacetate, ACN, Acetone, MeOH, EtOH, Propanol, Butanol, DMF, and DMSO

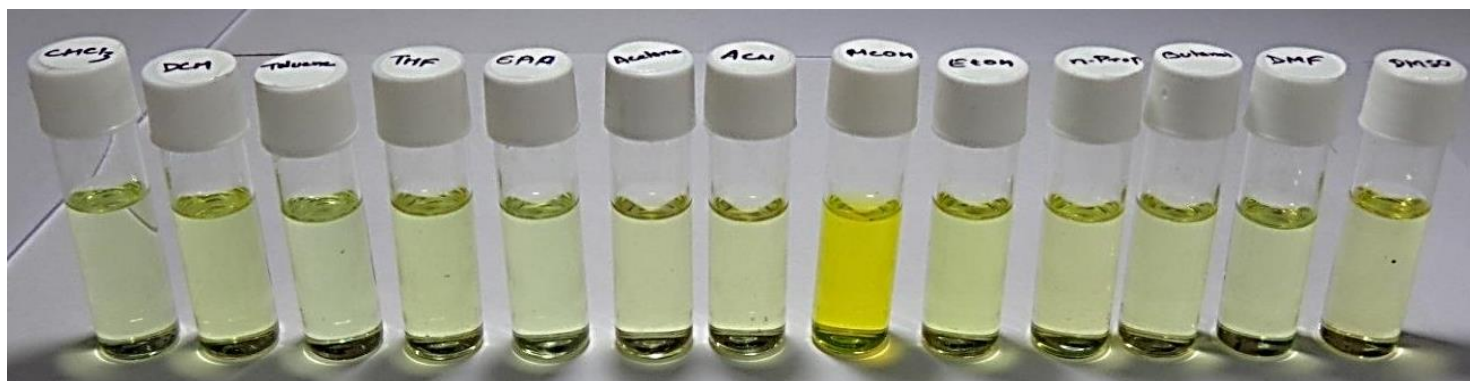

**Figure S6b:** Selective fluorescence color changes (Under UV light) of **RC** in various solvents; from left to right: **RC**, MeOH, EtOH, Propanol, Butanol, Acetone, Ethyl acetate, Toluene, DCM,  $\text{CHCl}_3$ , THF, ACN, DMF, DMSO and Water.

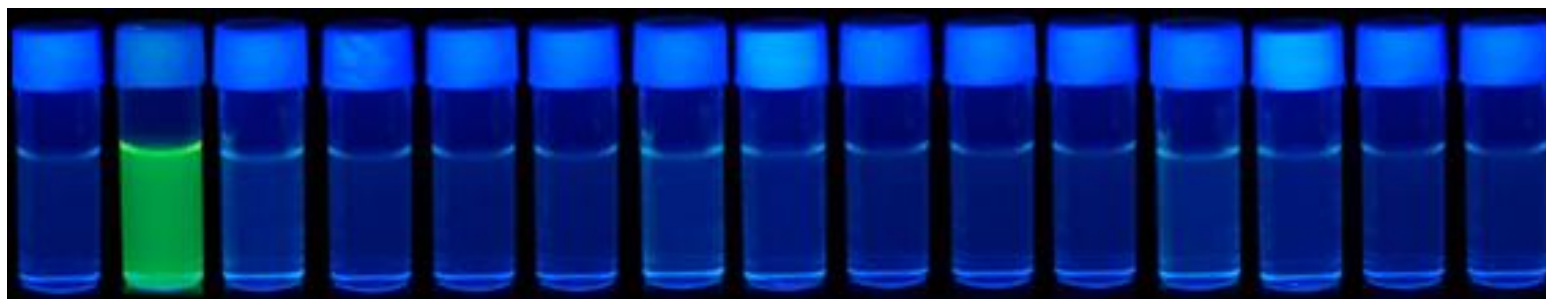

Electronic Supplementary Informations

Figure S7:  $^1\text{H}$  NMR spectrum of RO in  $\text{CDCl}_3$ :

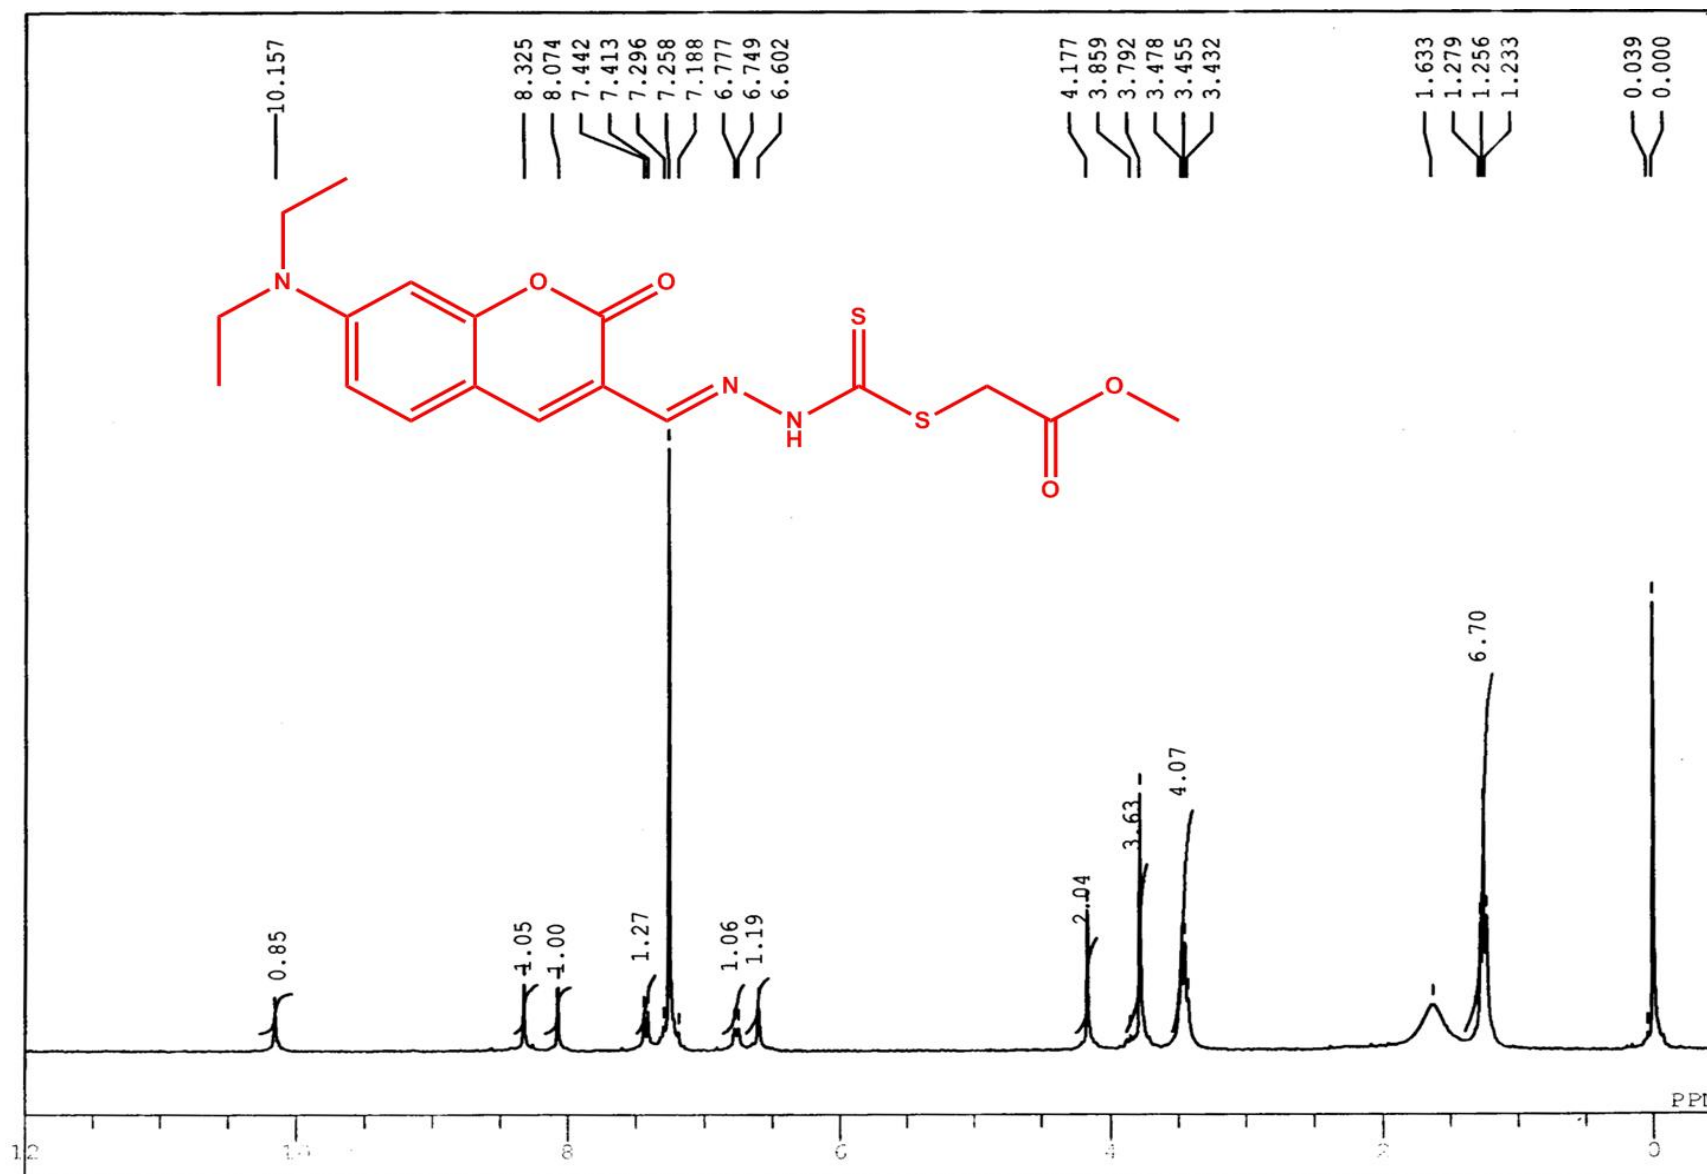

Figure S8: Proposed mechanism of nucleophile attack of methanol over RC:

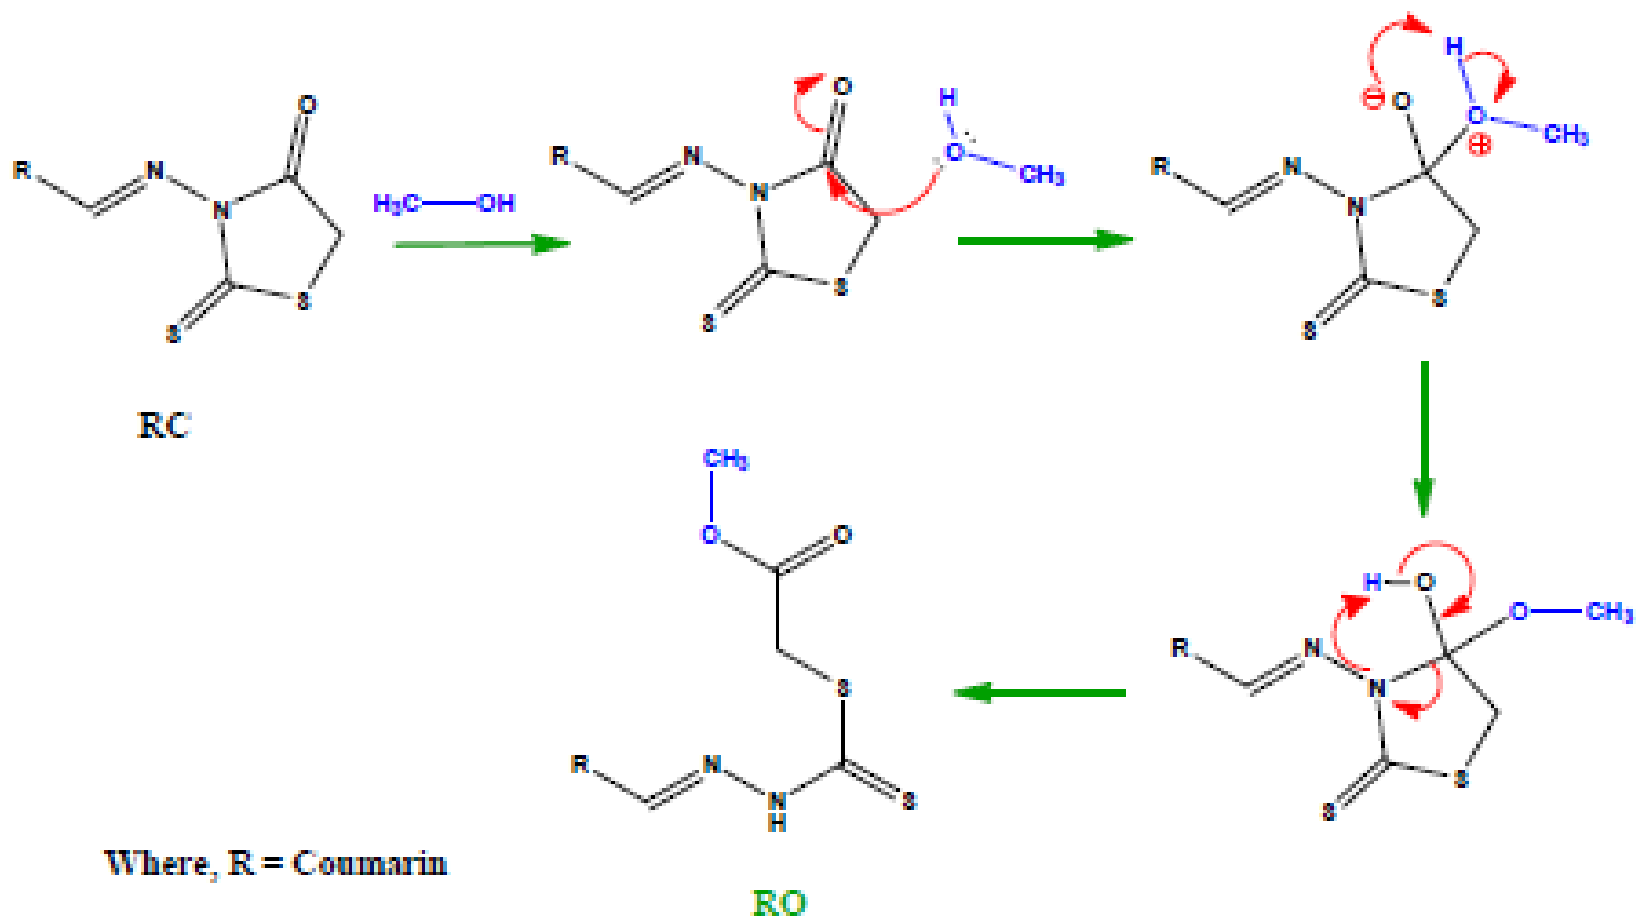

*Electronic Supplementary Informations*

**Figure S9:** IR spectrum of **RO**:

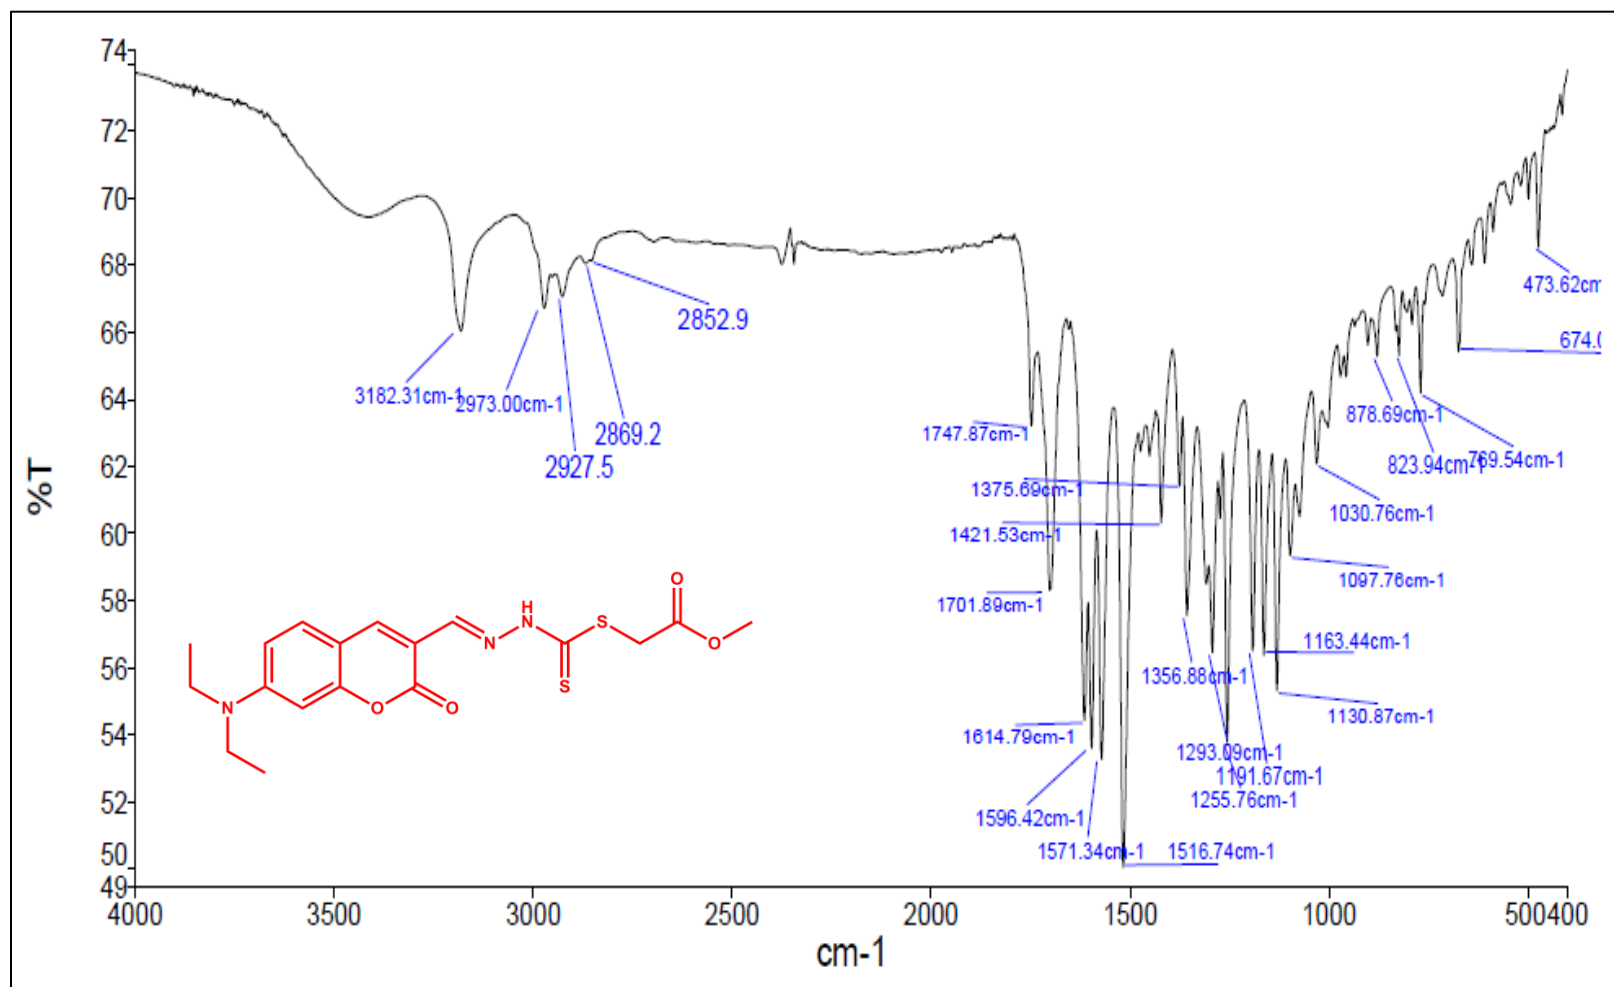

*Electronic Supplementary Informations*

**Figure S10:** Overlay IR spectrum of RC and RO:

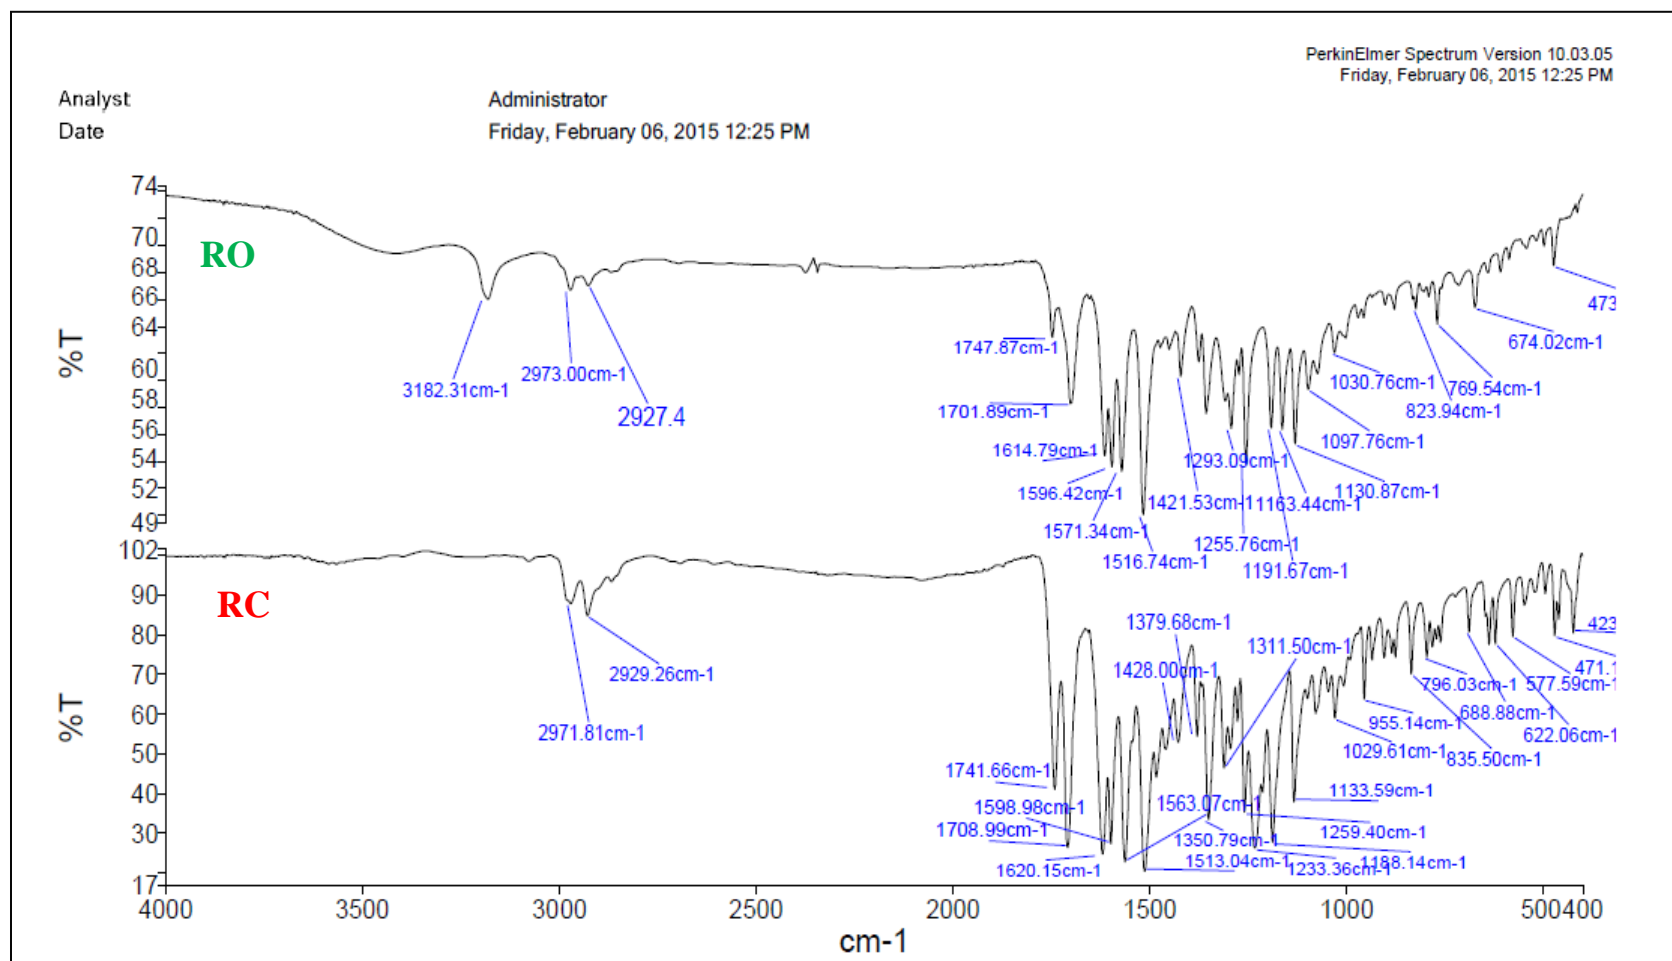

*Electronic Supplementary Informations*

**Figure S11:** Mass spectrum of **RO**:

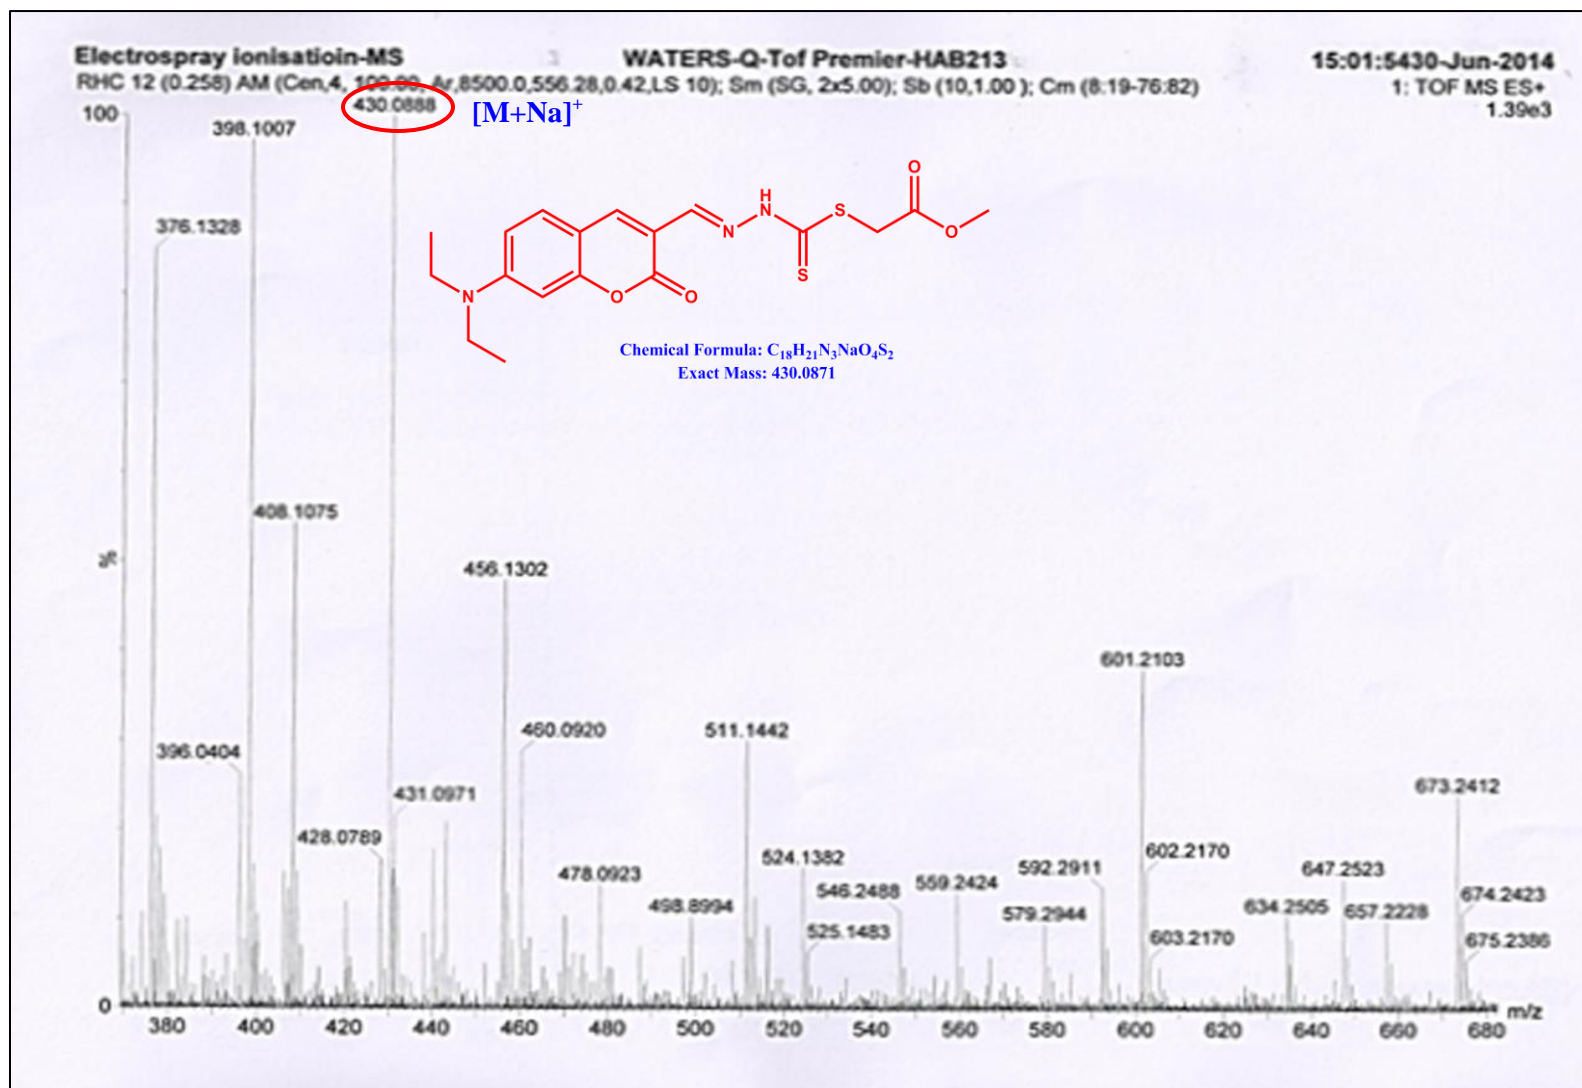



*Electronic Supplementary Informations*

**Figure S12:** HOMO-LUMO orbitals of **RC** and **RO** their calculated energy and energy gaps are shown:

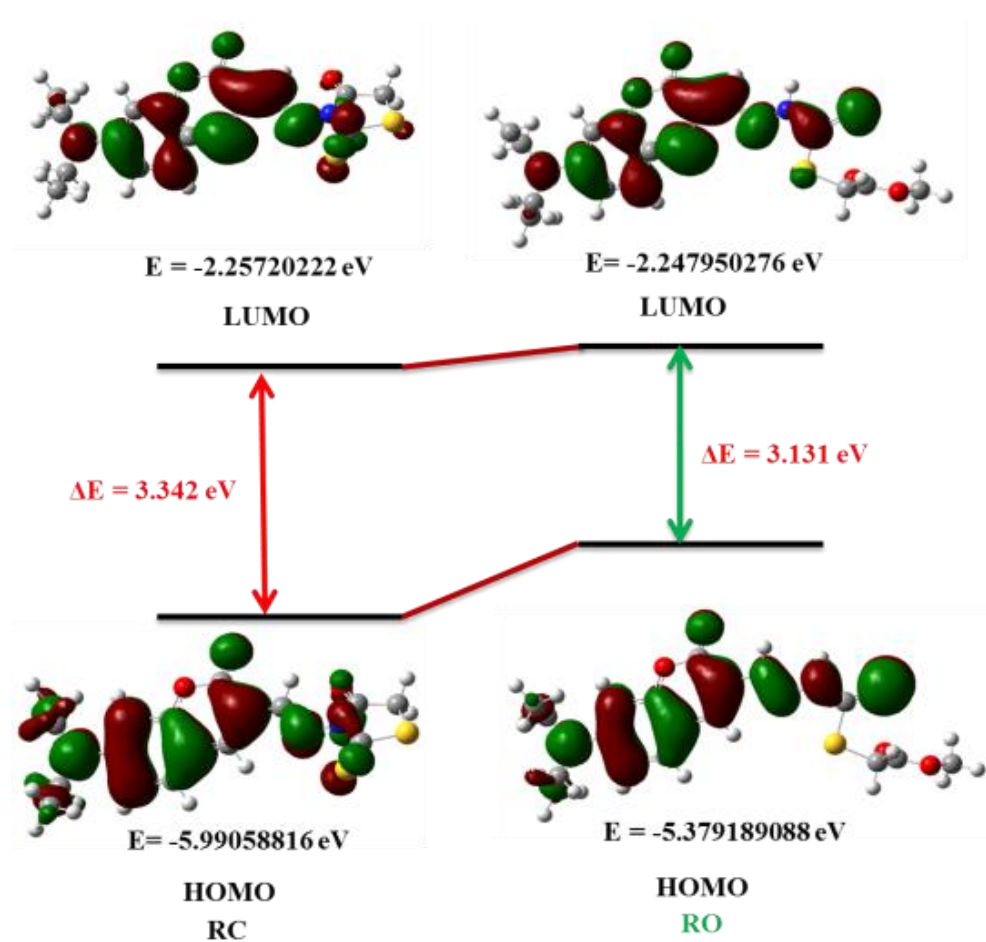

*Electronic Supplementary Informations*

**Figure S13:** Fluorescence reaction time profile of receptor **RC** at 0.5 $\mu$ M in MeOH:

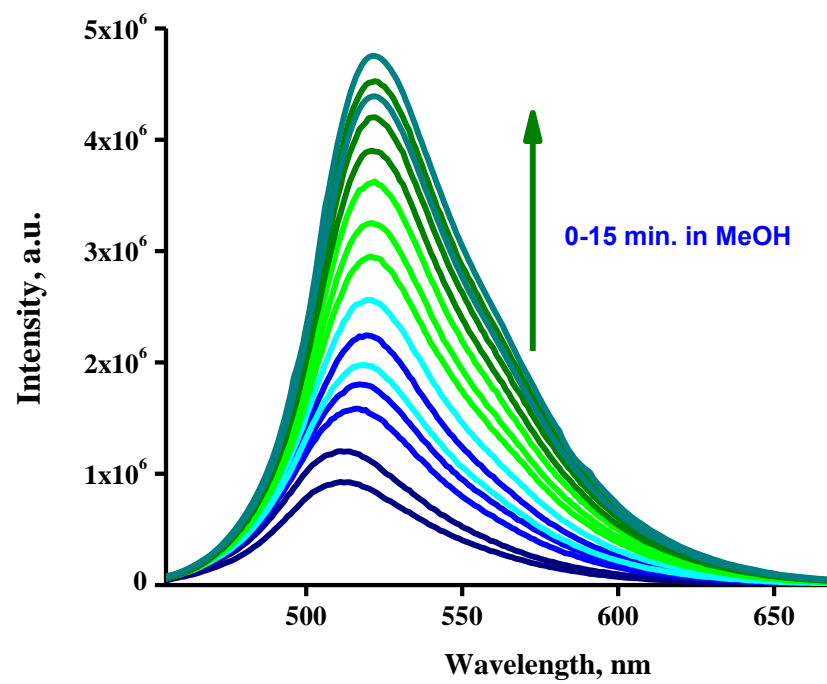

*Electronic Supplementary Informations*

**Figure S14:** Calibration curve of **RC** in water with increasing MeOH%:

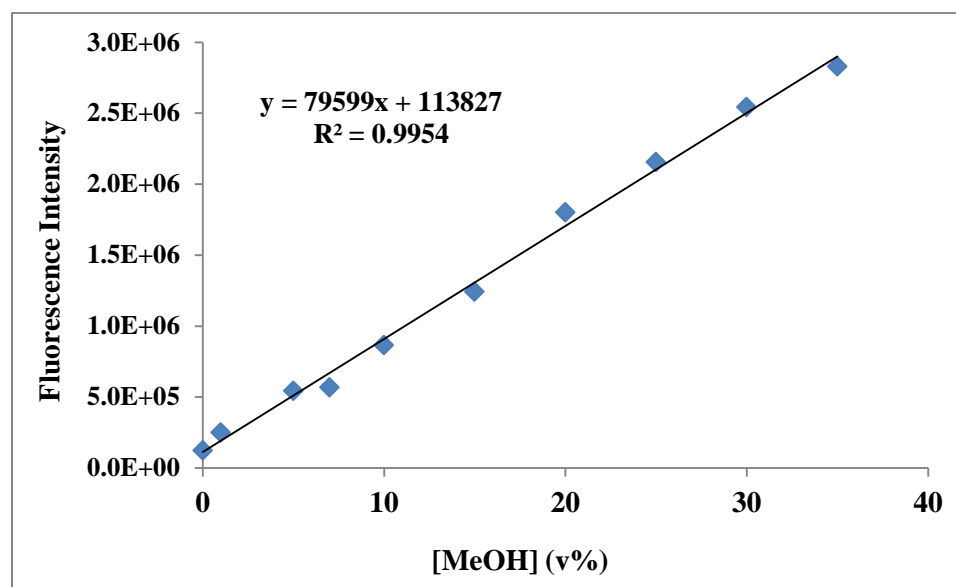

*Electronic Supplementary Informations*

**Table S1:** Important bond length and bond angle of **RO**:

| Atom        | Bond Length(Å) | Atom             | Bond angle |
|-------------|----------------|------------------|------------|
| S(2)- C(16) | 1.786(3)       | C(16)-S(2)-C(15) | 100.(1)    |
| S(2)-C(15)  | 1.752(2)       | C(9)-O(1)-C(13)  | 122.7(2)   |
| S(1)-C(15)  | 1.643(2)       | N(3)-N(2)-C(14)  | 116.1(2)   |
| O(1)- C(9)  | 1.377(3)       | C(17)-O(4)-C(18) | 115.1(2)   |
| O(1)-C(13)  | 1.381(3)       | N(2)-N(3)-C(15)  | 119.2(2)   |
| N(2)-N(3)   | 1.383(2)       |                  |            |
| N(2)-C(14)  | 1.271(4)       |                  |            |
| O(4)-C(17)  | 1.343(4)       |                  |            |
| O(4)-C(18)  | 1.445(3)       |                  |            |
| O(2)-C(13)  | 1.202(3)       |                  |            |
| N(3)-C(15)  | 1.339(4)       |                  |            |

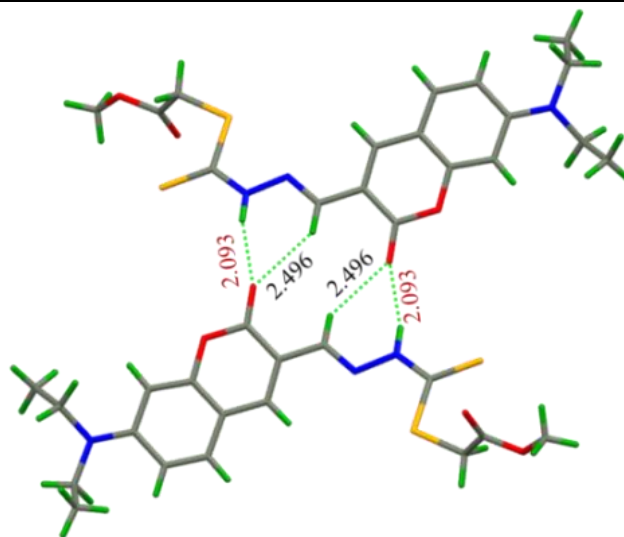

Showing intermolecular hydrogen bonding in **RO**

## Electronic Supplementary Informations

**Table S2:** Crystal data and structure refinement for **RO**:

|                                   |                                                                                                                                         |
|-----------------------------------|-----------------------------------------------------------------------------------------------------------------------------------------|
| <b>Identification code</b>        | <b>RO</b>                                                                                                                               |
| <b>CCDC No.</b>                   | <b>980304</b>                                                                                                                           |
| Empirical formula                 | C18 H21 N3 O4 S2                                                                                                                        |
| Formula weight                    | 407                                                                                                                                     |
| Temperature                       | 293(2) K                                                                                                                                |
| Wavelength                        | 0.71073 Å                                                                                                                               |
| Crystal system, space group       | Triclinic, P -1                                                                                                                         |
| Unit cell dimensions              | a = 6.9629(13) Å    alpha = 102.726(18) deg.<br>b = 10.231(3) Å    beta = 97.404(16) deg.<br>c = 14.781(2) Å    gamma = 94.658(18) deg. |
| Volume                            | 1012.0(3) Å <sup>3</sup>                                                                                                                |
| Z, Calculated density             | 2, 1.334 Mg/m <sup>3</sup>                                                                                                              |
| Absorption coefficient            | 0.291 mm <sup>-1</sup>                                                                                                                  |
| F(000)                            | 428.0                                                                                                                                   |
| Crystal size                      | 0.34 x 0.28 x 0.22 mm                                                                                                                   |
| Theta range for data collection   | 2.97 to 28.99 deg.                                                                                                                      |
| Limiting indices                  | -8<=h<=9, -9<=k<=13, -19<=l<=19                                                                                                         |
| Reflections collected / unique    | 6963 / 4036 [R(int) = 0.0397]                                                                                                           |
| Completeness to theta = 25.00     | 99.0 %                                                                                                                                  |
| Max. and min. transmission        | 1.00000 and 0.94362                                                                                                                     |
| Refinement method                 | Full-matrix least-squares on F <sup>2</sup>                                                                                             |
| Data / restraints / parameters    | 4036 / 0 / 248                                                                                                                          |
| Goodness-of-fit on F <sup>2</sup> | 0.960                                                                                                                                   |
| Final R indices [I>2sigma(I)]     | R1 = 0.0574, wR2 = 0.0556                                                                                                               |
| R indices (all data)              | R1 = 0.1294, wR2 = 0.0712                                                                                                               |
| Largest diff. peak and hole       | 0.213 and -0.161 e.Å <sup>-3</sup>                                                                                                      |

*Electronic Supplementary Informations*

**Table S3:** The selected experimental and calculated dihedral angles in **RC** and **RO**:

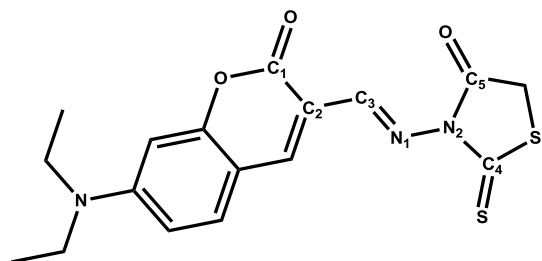

**RC**

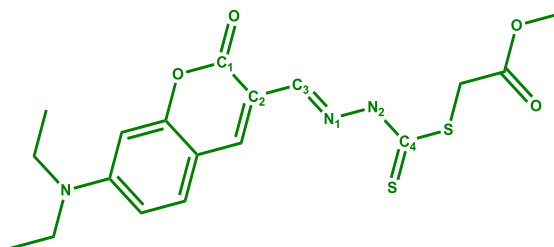

**RO**

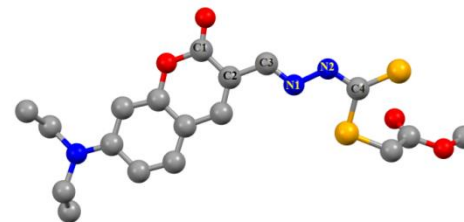

**Crystal structure RO**

**Dihedral angles of RC and RO**

DA1 = C1-C2-C3=N1  
 DA2 = C2-C3=N1-N2  
 DA3 = C3-N1-N2-C4  
 DA4 = N1-N2-C4-S1

| DFT calculated structure |        |        |        |        |        |         |        | Single Crystal Structure |        |         |        |
|--------------------------|--------|--------|--------|--------|--------|---------|--------|--------------------------|--------|---------|--------|
| RC                       |        |        |        | RO     |        |         |        | RO                       |        |         |        |
| DA1                      | DA2    | DA3    | DA4    | DA1    | DA2    | DA3     | DA4    | DA1                      | DA2    | DA3     | DA4    |
| 177.19                   | 177.62 | 139.15 | -11.13 | 178.96 | 179.64 | -179.97 | 179.73 | 166.62                   | 177.61 | -171.71 | 179.80 |

### Electronic Supplementary Informations

**Table S4:** Theoretical calculation of absorption maxima of **RC** and **RO** in MeOH using TD-DFT study:

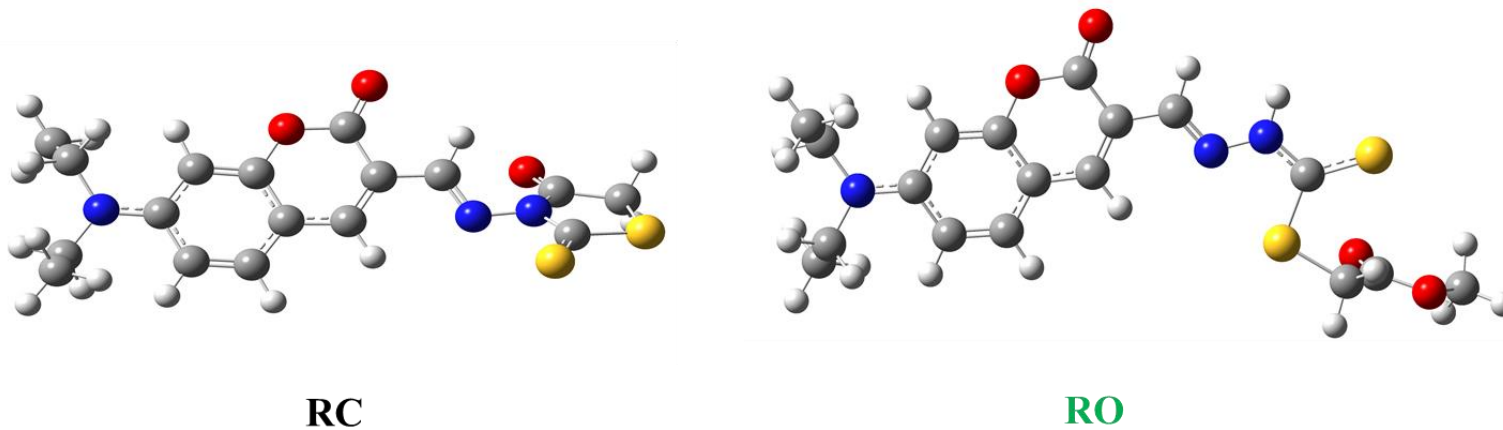

| Entry     | Major transitions    | Wavelength | Oscillator strength | Energy    | Contributions of Excitation % |
|-----------|----------------------|------------|---------------------|-----------|-------------------------------|
| <b>RO</b> | 107 → 108<br>0.63996 | 449.17 nm  | f=1.3047            | 2.7603 eV | HOMO → LUMO = 81.9            |
| <b>RC</b> | 98 → 99<br>0.63028   | 428.38 nm  | f=0.9064            | 2.8943 eV | HOMO → LUMO = 79.45           |
